# Supplementary material for: Comparing medical, dental, and nursing students’ preparedness to address lesbian, gay, bisexual, transgender, and queer health
Source: PLoS One. 2018 Sep 20;13(9):e0204104. doi: 10.1371/journal.pone.0204104 (PMC6147466; doi:10.1371/journal.pone.0204104)
Supplement: S1 Table — This table includes responses to all survey items from all student participants. (XLSX) [file pone.0204104.s001.xlsx]

## Sheet: All Trainee Data
	school	participant_id	train_code	age	gender___1	gender___2	gender___3	gender___4	gender___5	gender___6	sexual_orientation___1	sexual_orientation___2	sexual_orientation___3	sexual_orientation___4	sexual_orientation___5	sexual_orientation___6	sexual_orientation___7	race_ethnicity___1	race_ethnicity___2	race_ethnicity___3	race_ethnicity___4	race_ethnicity___5	race_ethnicity___6	training_prep_lgbtq	question_where_look	comfort_lgbtq_pts	respons_providers_treat	lgbq_tellbylooking	content_courses	trans_gnc_tellbylook	comfort_discuss_sexhlth	challenge_discuss_sexhlth_lgbtqpts	instructors_comp_caring	comfort_treat_trans	interest_info_atpenn
1	med	M001	3	26					1			1										1		1	1	1	1	5	1	4	1	4	2	1	1
2	med	M002	2	23			1	1			1			1				1						1	2	1	1	4	1	4	2	4	2	2	2
3	med	M003	4	25				1							1							1		2	4	2	1	5	1	5	1	1	2	4	1
4	med	M004	4	28					1						1							1		2	3	1	1	4	4	4	2	3	3	2	2
5	med	M005	4	26				1							1					1				2	3	1	1	4	1	4	2	3	2	2	1
6	med	M006	4	29				1							1							1		2	3	1	1	4	2	4	2	5	2	1	1
7	med	M007	4	29					1						1			1					1	4	4	2	1	4	4	4	2	4	4	2	2
8	med	M008	4	26					1						1					1		1		1	2	2	1	4	2	4	2	2	1	3	2
9	med	M009	4	29				1							1							1		2	3	2	2	4	2	4	2	2	3	3	3
10	med	M010	4	27				1			1	1										1		3	3	3	1	4	3	4	2	4	4	2	1
11	med	M011	4	29				1							1							1		2	4	1	1	4	2	4	2	3	2	3	3
12	med	M012	4	27				1							1			1		1		1		2	2	2	2	5	2	5	2	4	3	3	3
13	med	M013	4	28					1						1							1		2	2	2	2	4	2	4	2	4	2	2	3
14	med	M014	4	28				1					1									1		2	3	1	1	5	2	4	1	4	3	2	1
15	med	M015	4	25				1							1							1		2	2	1	1	5	2	4	2	2	3	2	2
16	med	M016	4	29					1						1						1	1		2	1	2	1	4	1	4	2	1	2	2	3
17	med	M017	4	27				1							1							1		3	2	2	1	4	4	3	2	4	3	4	2
18	med	M018	4	30					1						1			1						1	1	1	2	5	1	5	1	2	1	1	5
19	med	M019	4	25				1							1							1		3	4	2	1	4	2	4	2	2	3	3	2
20	med	M020	4	26					1						1					1		1		4	3	2	2	4	4	4	2	2	2	3	2
21	med	M021	4	28				1							1							1		2	1	1	1	5	2	5	1	4	2	2	1
22	med	M022	4	27					1						1				1					4	4	2	1	4	4	4	2	2	3	3	1
23	med	M023	4	26				1							1			1						2	3	2	1	4	4	4	1	4	2	2	1
24	med	M024	4	26				1							1							1		2	3	1	1	3	1	2	2	2	1	2	3
25	med	M025	4	28					1						1							1		3	3	2	1	5	2	5	2	2	2	3	2
26	med	M026	4	27					1						1				1					3	3	2	1	4	2	4	1	2	2	4	2
27	med	M027	4	27				1							1							1		3	3	2	1	5	2	5	2	4	2	3	1
28	med	M028	4	26				1							1							1		2	2	2	1	4	1	3	2	3	2	2	2
29	med	M029	4	27				1							1							1		2	2	1	1	4	2	4	2	2	2	2	2
30	med	M030	4	29					1						1			1	1					2	4	2	1	5	3	4	2	2	2	2	2
31	med	M031	4	27				1							1							1		2	4	2	1	5	2	5	1	4	2	2	2
32	med	M032	4	29				1							1							1		2	3	1	1	5	2	5	2	4	2	2	2
33	med	M033	4	28				1							1							1		2	1	1	1	4	3	3	2	4	3	3	2
34	med	M034	4	25				1							1			1						2	3	1	1	5	4	5	2	3	2	1	2
35	med	M035	4	26				1							1			1						3	4	3	1	5	2	4	2	3	3	4	1
36	med	M036	4	30					1						1				1					2	2	1	1	4	4	2	2	4	3	2	2
37	med	M037	4	29				1							1							1		4	3	2	1	5	4	5	1	2	3	2	1
38	med	M038	4	26					1						1				1	1		1		2	2	1	1	4	2	4	1	3	3	2	2
39	med	M039	4	25				1							1							1		3	2	2	1	4	2	4	1	3	2	2	2
40	med	M040	4	29					1			1										1		3	4	2	1	4	2	4	2	4	2	4	2
41	med	M041	4	27				1							1							1		4	2	3	1	5	2	5	2	3	3	3	2
42	med	M042	4	31				1							1				1					4	2	1	1	4	2	3	1	4	3	2	2
43	med	M043	4	27				1							1			1						3	3	3	1	4	3	4	2	2	2	4	2
44	med	M044	4	25				1							1				1					2	4	2	1	5	4	5	1	4	3	3	2
45	med	M045	4	28					1						1							1		3	4	2	1	4	3	4	1	2	3	3	1
46	med	M046	3	27				1										1						3	2	2	1	4	4	4	5	3	3	3	2
47	med	M047	4	34					1						1							1		2	3	1	1	4	2	4	1	2	2	2	4
48	med	M048	4	26				1					1									1		2	3	1	1	5	2	5	2	2	3	4	2
49	med	M049	4	26				1							1							1		3	4	2	2	4	4	4	2	3	2	3	2
50	med	M050	4	28				1							1							1		2	3	2	1	4	2	4	2	2	2	3	2
51	med	M051	4	29				1							1								1	3	4	3	2	5	2	4	2	2	3	4	1
52	med	M052	4	24					1						1							1		1	2	1	1	4	1	4	3	4	2	2	2
53	med	M053	4	25				1							1							1		2	2	1	1	5	4	5	1	5	3	1	2
54	med	M054	4	24					1						1			1						2	3	3	1	2	1	4	2	2	3	5	5
55	med	M055	4	28					1						1							1		4	2	1	1	5	4	2	2	4	3	2	2
56	med	M056	4	27				1							1				1					2	2	2	1	5	4	4	1	4	5	2	1
57	med	M057	4	25				1							1							1		2	3	2	1	5	3	5	2	2	3	3	1
58	med	M058	4	27					1						1						1	1		2	3	2	1	5	2	5	2	3	2	3	2
59	med	M059	4	30					1						1							1		3	4	3	1	5	4	5	1	2	2	4	1
60	med	M060	4	26					1						1				1					3	3	3	1	5	4	5	2	2	3	2	2
61	med	M061	4	28				1							1				1					3	2	1	1	4	2	2	2	4	3	2	1
62	med	M062	4	25					1						1							1		2	2	2	1	5	2	5	2	3	3	3	2
63	med	M063	2	24				1							1							1		2	2	2	2	5	2	4	2	3	2	3	3
64	med	M064	2					1							1							1		1	1	2	2	5	1	4	4	4	2	2	2
65	med	M065	2					1							1							1		3	3	2	1	5	2	5	2	2	3	3	2
66	med	M066	2	24				1							1							1		2	3	2	2	3	2	3	2	3	3	3	2
67	med	M067	2	23				1							1							1		2	2	2	1	5	2	5	2	2	2	2	2
68	med	M068	2	23				1							1							1		1	2	1	1	4	1	3	3	4	2	2	1
69	med	M069	2	23					1			1										1		2	2	1	1	4	1	4	2	4	2	2	1
70	med	M070	2	24				1					1									1		2	2	2	1	4	2	4	3	4	3	3	2
71	med	M071	2	24					1						1							1		2	3	2	1	4	2	5	2	2	3	2	2
72	med	M072	2	23				1							1			1						2	4	3	1	5	3	5	2	3	3	3	1
73	med	M073	2	23					1			1						1						2	2	2	1	4	4	4	3	4	2	3	1
74	med	M074	4	33				1					1									1		2	2	2	1	5	2	5	2	3	2	2	1
75	med	M075	3					1							1							1		3	2	2	1	3	4	2	1	4	3	3	2
76	med	M076	3	24				1							1					1				2	2	1	1	5	2	5	1	4	1	1	1
77	med	M077	3	28					1						1							1		2	2	1	1	5	2	4	1	4	2	2	2
78	med	M078	3	33				1							1							1		2	2	2	1	3	2	3	2	4	2	2	2
79	med	M079	3	24					1						1							1		1	2	1	1	5	1	5	1	4	2	2	2
80	med	M080	3	24					1						1							1		2	2	1	1	3	1	2	1	4	2	2	4
81	med	M081	3	26					1						1					1				2	3	1	1	4	1	4	2	4	1	2	4
82	med	M082	3	28				1					1										1	2	2	2	2	4	2	4	1	4	2	2	2
83	med	M083	3	24					1						1							1		3	4	2	2	4	2	5	2	4	2	2	2
84	med	M084	3	24				1							1							1		1	1	1	1	4	1	5	2	1	2	5	3
85	med	M085	3	24					1						1							1		2	2	3	2	4	2	4	2	2	1	4	2
86	med	M086	3					1							1							1		3	4	4	1	4	2	4	2	3	2	3	1
87	med	M087	3	24				1							1			1						2	4	2	1	3	2	3	1	2	2	2	2
88	med	M088	3	24					1						1			1						2	4	2	2	4	2	4	2	4	3	3	3
89	med	M089	3	28					1						1							1		2	2	3	2	4	2	4	4	2	3	4	4
90	med	M090	3	24					1						1							1		2	2	3	1	4	2	4	2	3	2	2	2
91	med	M091	3	25				1							1								1	4	2	2	3	5	2	5	2	3	4	3	1
92	med	M092	3	26					1						1							1		2	2	1	2	5	1	3	1	2	2	1	2
93	med	M093	3	24				1							1							1		2	3	2	1	4	1	4	2	2	2	2	2
94	med	M094	3	25				1							1							1		2	1	1	1	5	3	5	2	4	3	1	1
95	med	M095	3	25				1							1				1		1			3	3	2	1	5	2	5	2	4	3	1	1
96	med	M096	3	24				1							1							1		3	3	2	1	4	2	4	2	3	3	2	1
97	med	M097	3	31				1							1					1				4	4	1	1	5	3	4	2	4	3	2	3
98	med	M098	3	25					1						1				1					4	4	3	1	4	4	4	2	2	3	4	2
99	med	M099	3	25				1							1				1					2	5	1	1	5	3	5	2	4	3	1	1
100	med	M100	3	26				1							1				1					3	4	2	2	3	2	3	2	2	3	2	2
101	med	M101	3	24					1						1							1		3	4	3	1	4	2	4	3	2	3	4	2
102	med	M102	3	26					1						1							1		2	1	1	1	4	2	4	1	4	2	1	1
103	med	M103	3	24				1							1								1	3	3	2	1	5	2	5	1	5	3	2	2
104	med	M104	3	28				1							1							1		3	2	1	1	4	3	4	1	4	3	2	3
105	med	M105	3	25				1							1							1		2	2	2	1	4	2	4	2	2	1	3	2
106	med	M106	3	25					1						1							1		3	4	2	2	4	2	3	2	2	2	2	4
107	med	M107	3	24					1						1							1		2	3	1	1	5	2	4	1	4	2	2	2
108	med	M108	3	25				1							1				1					3	4	3	1	3	4	5	1	4	3	5	1
109	med	M109	3	25					1						1							1		2	2	1	1	4	1	4	1	4	2	1	1
110	med	M110	3	24					1						1			1						3	2	3	1	3	2	3	1	1	3	3	1
111	med	M111	3	24				1					1					1						3	3	3	1	4	2	4	2	3	2	3	1
112	med	M112	3	28					1						1			1						2	2	1	1	5	1	4	2	2	2	2	2
113	med	M113	3	24					1						1			1						2	4	1	1	5	4	4	2	4	2	2	1
114	med	M114	3	28					1						1							1		3	2	1	1	5	3	5	1	4	2	1	1
115	med	M115	3	26					1						1							1		2	2	2	2	4	2	3	2	2	2	2	3
116	med	M116	3	25				1							1							1		2	4	1	1	5	3	4	1	2	2	1	2
117	med	M117	3	25					1						1							1		2	3	1	1	4	2	4	2	3	3	1	2
118	med	M118	3	25					1						1			1						2	2	2	2	4	2	4	2	4	2	2	4
119	med	M119	3	28				1							1							1		3	2	2	1	5	3	4	2	3	2	2	1
120	med	M120	3	25				1							1				1					2	2	1	1	4	2	4	2	4	2	2	1
121	med	M121	3	27					1						1							1		2	2	1	1	5	3	4	1	2	4	4	1
122	med	M122	3	25				1							1			1				1		2	2	2	2	5	2	5	2	3	3	2	2
123	med	M123	3	25					1						1			1						3	2	3	1	3	2	3	2	3	2	4	3
124	med	M124	3	24					1						1			1						2	2	2	1	2	2	2	2	2	2	2	2
125	med	M125	3	27				1							1							1		3	2	1	1	4	2	4	1	2	4	1	1
126	med	M126	3	24					1						1							1		3	4	2	1	3	4	3	3	4	2	3	2
127	med	M127	3	28				1							1			1						1	1	1	1	3	2	3	2	4	2	4	1
128	med	M128	3	25				1							1			1				1	1	3	4	2	2	4	5	4	1	4	3	2	1
129	med	M129	3	24				1							1								1	2	3	2	1	5	2	5	2	2	3	3	3
130	med	M130	3	28				1							1							1		3	3	3	1	4	3	3	3	4	3	4	2
131	med	M131	3					1							1				1					2	2	2	2	5	1	5	1	4	3	2	4
132	med	M132	3	24					1						1			1				1		2	1	1	1	3	3	2	1	4	3	3	2
133	med	M133	3	27					1						1							1		2	2	1	1	2	2	2	1	4	3	1	2
134	med	M134	3						1						1					1				2	4	2	1	5	2	5	2	3	3	2	1
135	med	M135	3	29					1						1							1		3	3	2	1	5	3	5	2	2	3	4	1
136	med	M136	3	26					1						1							1		2	1	1	2	4	3	3	1	4	2	2	2
137	med	M137	3						1						1							1		1	1	1	5	4	1	4	2	5	1	1	5
138	med	M138	3	30				1									1					1		5	2	1	1	4	4	4	2	5	5	1	2
139	med	M139	3	27				1							1							1		2	2	1	1	5	2	5	2	3	1	1	2
140	med	M140	3	25					1						1							1		2	1	1	1	3	1	3	1	5	1	1	1
141	med	M141	3	31				1							1							1		3	2	2	1	5	2	4	1	3	2	3	2
142	med	M142	3	24					1						1			1						2	2	2	1	4	2	4	2	2	2	2	2
143	med	M143	3	26					1						1					1		1		3	2	2	1	5	3	4	2	4	2	3	3
144	med	M144	3	25					1						1			1						5	2	2	1	4	1	3	1	5	5	3	2
145	med	M145	3	29					1						1							1		2	2	1	1	4	1	4	1	3	2	2	2
146	med	M146	3	26					1						1					1				1	1	1	1	3	1	3	1	2	1	1	1
147	med	M147	3	26				1							1					1				3	4	2	2	4	4	4	2	4	3	2	2
148	med	M148	3	24					1						1							1		2	1	1	1	4	1	4	1	5	1	1	2
149	med	M149	3	24					1						1			1						3	4	3	1	4	2	4	2	2	2	2	2
150	med	M150	3						1						1							1		2	3	2	2	4	2	4	2	3	3	3	3
151	med	M151	3	30					1						1							1		2	2	1	1	4	2	4	2	1	1	2	1
152	med	M152	3	26					1						1							1		2	2	1	1	5	2	5	1	4	3	3	2
153	med	M153	3	25					1						1							1		2	3	1	1	4	2	3	2	3	2	2	2
154	med	M154	3	28				1							1							1		2	3	1	1	5	1	4	2	4	2	2	2
155	med	M155	3	27				1							1							1		3	4	2	1	5	2	4	2	3	2	3	1
156	med	M156	3	24					1						1				1					3	2	1	1	5	2	5	2	2	3	3	2
157	med	M157	3	28					1						1			1						2	2	2	2	4	3	2	2	2	2	2	2
158	med	M158	3	25				1							1			1				1		4	4	2	1	3	2	2	4	3	3	4	1
159	med	M159	3	24					1						1			1						3	5	4	2	5	3	4	2	2	3	4	2
160	med	M160	3	24					1						1							1		1	2	2	1	3	1	3	1	2	2	2	3
161	med	M161	3	28				1							1							1		2	3	1	1	4	2	4	1	4	2	1	1
162	med	M162	3	24				1							1				1					2	2	1	1	4	4	4	1	2	4	2	1
163	med	M163	3	24					1						1							1		2	2	1	1	4	2	4	1	2	3	2	3
164	med	M164	3	24				1							1							1		1	3	1	1	4	1	4	2	3	1	2	2
165	med	M165	3	26				1							1			1						3	2	3	2	4	4	4	1	4	4	1	1
166	med	M166	3	25					1						1							1		3	4	2	1	4	4	4	3	2	1	4	3
167	med	M167	3	24				1							1			1						2	2	2	1	4	2	4	3	2	2	2	2
168	med	M168	3						1						1							1		4	4	2	1	4	4	4	2	4	3	2	1
169	med	M169	3	24					1						1			1						4	4	3	2	3	3	3	1	2	2	2	2
170	med	M170	3	27				1							1							1		3	2	2	1	4	2	3	3	2	3	3	2
171	med	M171	3	30				1							1				1					3	2	2	1	3	2	4	1	5	3	4	1
172	med	M172	3	25				1						1						1				4	3	3	1	5	4	4	2	2	3	1	1
173	med	M173	3	24					1								1	1						3	4	2	1	4	3	3	2	4	2	2	1
174	med	M174	3	24					1						1			1						2	3	2	1	4	2	5	2	2	2	2	1
175	med	M175	3	26					1						1			1						1	1	1	1	3	1	3	2	5	1	1	1
176	med	M176	3	30					1						1							1		2	2	3	1	4	2	4	1	2	3	3	2
177	med	M177	3	27				1							1						1	1		4	2	1	1	5	3	4	1	5	2	3	2
178	med	M178	3	24					1						1					1		1		2	3	1	1	5	2	5	3	4	1	1	2
179	med	M179	3	24					1			1						1						3	2	2	1	5	3	4	4	4	2	4	1
180	med	M180	3	28				1							1							1		3	2	1	1	5	3	3	2	4	3	2	2
181	med	M181	3	25				1							1							1		2	4	2	1	4	2	4	2	2	2	3	1
182	med	M182	3	28				1							1							1		3	2	2	1	5	3	4	2	4	2	2	2
183	med	M183	3	26				1							1							1		2	2	2	1	4	2	3	2	2	3	3	2
184	med	M184	3	26					1						1							1		2	1	1	1	4	1	4	2	4	2	2	3
185	med	M185	3	25				1							1				1					2	3	4	4	5	1	5	1	2	4	4	4
186	med	M186	3	24					1						1			1					1	4	4	1	1	1	4	4	1	5	5	1	2
187	med	M187	3	28					1						1					1				2	1	2	2	2	2	2	2	2	2	2	3
188	med	M188	3	28				1							1				1					3	2	2	1	4	2	4	2	2	3	5	3
189	med	M189	3	28				1							1							1		2	1	1	1	5	2	5	2	4	1	3	1
190	med	M190	3	28					1						1			1						1	1	1	1	5	2	5	2	4	2	1	4
191	med	M191	3	26					1						1							1		2	2	1	1	1	1	1	1	1	1	1	1
192	med	M192	3	24				1							1								1	2	2	2	1	4	2	4	2	2	3	3	1
193	med	M193	3	25					1						1					1		1		2	2	1	1	4	2	4	2	3	3	2	2
194	med	M194	3	25				1							1							1		2	4	2	2	4	1	4	2	2	3	2	2
195	med	M195	3	24				1							1			1				1		2	2	1	1	4	2	5	1	5	3	1	2
196	med	M196	3	25					1						1					1				4	4	2	2	4	4	5	2	2	3	2	2
197	med	M197	3	23				1							1			1						4	2	2	1	5	3	5	3	2	2	4	1
198	med	M198	3	25					1						1				1					2	2	1	1	4	2	4	2	3	2	2	2
199	med	M199	2						1						1			1						2	2	2	1	3	2	3	2	2	2	4	3
200	med	M200	2	25					1						1			1						2	2	2	2	3	2	3	2	2	2	2	3
201	med	M201	2	23				1							1								1	3	2	1	1	5	2	4	1	4	1	2	2
202	med	M202	2	24					1						1							1		1	1	1	1	4	2	4	2	4	2	2	1
203	med	M203	2	24				1							1							1		2	2	1	1	5	1	5	1	2	1	1	1
204	med	M204	2	23				1							1			1						2	2	2	1	4	2	5	3	3	2	3	2
205	med	M205	2	23				1							1							1		2	3	2	1	5	2	5	2	3	2	3	1
206	med	M206	2	23				1							1				1					1	3	3	1	4	2	1	4	2	2	4	5
207	med	M207	2	29					1						1							1		3	2	3	1	5	2	5	2	2	3	3	1
208	med	M208	2	26					1						1							1		2	1	3	1	5	1	5	2	3	2	2	3
209	med	M209	2	26				1							1							1		1	1	2	1	5	1	4	2	2	2	3	2
210	med	M210	2	23				1							1						1	1		2	3	1	2	3	2	3	1	3	2	1	2
211	med	M211	2	24				1							1			1						2	3	2	1	4	2	4	2	2	3	2	2
212	med	M212	2	26					1					1								1		1	1	1	1	4	2	3	1	5	2	1	1
213	med	M213	2	24					1						1			1						3	4	2	2	4	2	4	2	3	3	3	2
214	med	M214	2	25					1						1							1		3	4	3	1	5	2	4	3	3	2	3	2
215	med	M215	2	24				1							1							1		2	3	1	1	3	3	3	2	3	2	2	1
216	med	M216	2	24					1						1			1						2	1	1	1	4	1	3	2	4	1	1	4
217	med	M217	2	25				1							1							1		3	4	2	2	5	2	4	4	2	3	5	2
218	med	M218	2	24					1						1			1						2	2	3	2	3	2	3	3	2	3	3	2
219	med	M219	2	24					1						1			1						2	4	2	2	4	1	3	2	2	2	2	4
220	med	M220	2						1						1					1				2	2	2	2	4	1	4	1	2	2	3	4
221	med	M221	2	32					1						1							1		2	2	1	1	5	2	5	2	4	3	1	1
222	med	M222	2	23					1						1							1		2	2	2	1	3	2	5	1	2	2	2	3
223	med	M223	2	25				1					1									1		2	2	2	1	4	2	4	1	2	3	2	1
224	med	M224	2	23				1							1			1						3	2	3	1	5	4	5	3	3	3	3	1
225	med	M225	2	26					1						1							1		4	4	1	2	4	4	4	1	5	3	1	1
226	med	M226	2	24					1						1					1		1		2	2	2	1	4	2	4	2	2	2	3	3
227	med	M227	2	24				1					1					1						2	4	2	1	4	2	4	2	4	2	3	3
228	med	M228	2	23				1							1							1		3	3	2	1	3	2	3	1	2	3	4	4
229	med	M229	2	24					1						1					1		1		1	1	1	1	4	1	4	2	2	1	2	3
230	med	M230	2					1							1							1		2	3	1	1	5	2	5	1	5	3	1	2
231	med	M231	2	25				1						1								1		4	3	3	1	5	3	5	3	4	4	3	1
232	med	M232	2	24				1						1								1		2	1	1	1	5	2	5	1	3	3	1	1
233	med	M233	2	24				1							1				1	1				3	3	2	1	3	3	3	3	4	3	3	2
234	med	M234	2	25				1							1							1		2	2	2	1	5	2	5	2	3	3	3	2
235	med	M235	2	23				1							1							1		3	3	2	2	4	2	4	3	3	2	3	2
236	med	M236	2	23					1						1					1				2	2	2	2	4	2	5	3	3	2	3	2
237	med	M237	2	23				1							1				1					3	2	3	1	3	1	3	2	4	3	3	2
238	med	M238	2	26					1						1							1		3	3	2	1	5	2	4	2	2	3	2	2
239	med	M239	2	26					1						1							1		2	1	2	2	4	1	4	1	3	2	2	4
240	med	M240	2	23					1						1			1						3	2	3	1	3	1	3	2	1	2	2	2
241	med	M241	2	24					1						1			1				1		2	4	3	1	5	2	4	3	3	3	3	2
242	med	M242	2	24					1						1							1		2	1	2	2	4	1	4	2	1	1	4	4
243	med	M243	2	26					1						1							1		2	1	1	1	3	2	3	2	3	2	1	1
244	med	M244	2	25					1						1							1		2	4	3	1	5	2	5	3	2	4	3	2
245	med	M245	2	23					1						1							1		2	3	2	2	4	2	4	2	3	2	4	2
246	med	M246	2	23					1						1			1						2	2	1	1	4	1	5	2	4	1	1	2
247	med	M247	2	22					1						1			1						4	2	2	1	4	2	4	2	3	3	4	2
248	med	M248	2	24				1							1			1						3	3	2	1	4	2	5	2	3	3	3	1
249	med	M249	2	25				1							1							1		2	2	2	1	5	2	5	1	3	2	2	1
250	med	M250	2	28				1							1							1		2	1	1	1	1	1	5	2	3	1	1	1
251	med	M251	2	34					1						1							1		2	3	2	2	4	2	3	2	2	3	3	2
252	med	M252	2	25					1						1				1					2	3	1	1	2	2	2	1	4	2	1	1
253	med	M253	2						1						1							1		2	1	2	3	4	1	4	2	2	1	2	5
254	med	M254	2	28				1							1			1						2	2	2	1	4	2	4	3	4	2	4	2
255	med	M255	2	28					1						1							1		2	2	2	2	5	2	5	2	3	3	2	4
256	med	M256	2	23					1						1							1		3	2	2	1	5	2	4	3	3	2	3	2
257	med	M257	2	26				1							1							1		2	3	1	1	5	1	5	2	3	2	2	2
258	med	M258	2	23				1							1							1		2	2	2	2	5	1	4	2	2	2	4	2
259	med	M259	2	25				1							1							1		1	2	1	1	4	2	4	1	4	1	2	1
260	med	M260	2	27				1							1					1				1	2	2	1	4	1	4	2	4	2	2	2
261	med	M261	2	26					1						1							1		3	4	1	2	4	3	4	2	3	3	2	1
262	med	M262	2	25					1						1							1		4	4	2	2	4	4	4	2	2	2	4	1
263	med	M263	2	23					1						1								1	2	3	2	1	4	3	5	3	3	3	3	2
264	med	M264	2	24					1				1					1						4	2	3	1	5	2	5	1	2	3	3	1
265	med	M265	3						1						1				1					2	1	1	1	5	1	5	1	5	1	5	1
266	med	M266	2						1						1								1	1	2	1	1	4	2	4	2	4	1	1	2
267	med	M267	2	27				1							1					1		1		2	4	1	1	4	2	4	1	4	3	2	3
268	med	M268	2	25					1						1			1						2	2	2	1	5	2	5	2	2	3	3	2
269	med	M269	2	25					1			1										1		2	1	1	1	3	3	4	1	3	3	2	2
270	med	M270	2	24				1					1							1		1		3	3	2	1	5	2	4	1	4	2	2	1
271	med	M271	2	25				1							1			1						2	3	2	1	5	2	5	2	2	2	3	2
272	med	M272	2	24				1							1							1		3	3	2	2	5	2	5	4	3	3	3	3
273	med	M273	2					1							1							1		2	2	1	1	3	2	3	1	4	1	1	2
274	med	M274	2	24				1							1							1		2	2	3	1	5	2	5	2	3	3	2	1
275	med	M275	2						1						1					1				3	3	2	1	3	3	3	4	2	3	2	3
276	med	M276	2	24					1						1							1		3	4	1	1	4	2	4	2	2	3	3	1
277	med	M277	2	28					1						1							1		3	4	3	2	4	4	4	2	2	3	2	2
278	med	M278	2	29					1						1							1		2	3	3	1	5	2	5	3	3	3	4	1
279	med	M279	2	22					1						1					1				1	2	1	1	3	1	2	1	4	1	1	2
280	med	M280	2	24					1						1				1					2	3	2	2	4	2	4	2	3	3	3	2
281	med	M281	2	23					1						1				1					1	1	1	1	2	2	2	1	4	1	1	1
282	med	M282	2	24				1							1				1					3	2	2	2	5	2	5	2	4	2	2	1
283	med	M283	2	23					1						1					1				2	2	1	1	4	2	4	2	3	2	2	2
284	med	M284	2	24					1			1										1		2	2	2	1	5	2	5	2	4	3	3	1
285	med	M285	2	25				1							1					1		1		2	2	2	2	4	2	4	4	4	2	2	2
286	med	M286	2	24				1							1			1						2	2	1	1	3	2	3	1	4	1	1	1
287	med	M287	2	24				1							1							1		3	3	3	3	4	2	4	2	4	2	3	3
288	med	M288	2	23					1						1			1						3	3	2	2	4	2	4	2	3	2	4	2
289	med	M289	2	29					1						1							1		1	1	1	2	4	1	4	1	1	2	3	2
290	med	M290	2	28				1							1			1				1		2	3	2	1	5	2	5	1	3	3	2	3
291	med	M291	2	28				1							1				1					2	2	1	2	3	3	3	1	4	2	1	1
292	med	M292	2	25				1							1							1		3	4	2	1	4	2	4	2	3	3	2	1
293	med	M293	2	27					1						1							1		3	4	2	1	2	2	4	2	3	2	3	3
294	med	M294	2	24					1						1							1		3	3	2	1	5	2	5	2	2	3	2	2
295	med	M295	2	22					1						1				1					2	2	1	1	3	2	3	3	4	2	2	2
296	med	M296	2					1							1							1		3	4	1	2	5	2	4	3	3	3	2	2
297	med	M297	2	24					1						1							1		3	4	1	1	4	2	4	2	2	3	2	3
298	med	M298	2	24					1						1							1		3	4	2	1	5	2	4	2	4	2	3	3
299	med	M299	2	26				1							1							1		1	2	1	1	5	1	5	2	5	1	2	2
300	med	M300	2	23					1						1							1		2	3	2	1	5	1	5	2	4	3	2	3
301	med	M301	2	26				1							1							1		2	4	2	1	5	2	4	1	5	2	2	1
302	med	M302	2	23				1							1							1		2	3	2	2	4	2	4	3	4	2	2	2
303	med	M303	2	24				1							1							1		2	2	1	1	5	2	5	1	3	3	2	1
304	med	M304	2	23			1	1			1			1				1						2	3	1	1	2	2	5	2	4	2	2	2
305	med	M305	2	23					1						1					1				1	2	1	2	5	1	5	2	5	1	2	3
306	med	M306	2	24					1						1			1						2	3	2	1	4	2	4	2	2	3	4	1
307	med	M307	2	24				1							1			1						3	4	1	1	5	3	5	2	2	3	2	2
308	med	M308	2	23				1							1			1						3	4	2	2	5	2	4	2	3	2	3	2
309	med	M309	2	23					1						1							1		2	1	5	1	4	1	4	2	3	2	5	1
310	med	M310	2	25				1							1			1						2	2	1	2	4	2	4	2	4	2	2	2
311	med	M311	2	25					1						1							1		3	2	2	1	5	2	5	2	3	3	2	2
312	med	M312	2	24					1						1					1		1		2	2	1	1	5	1	5	1	4	2	3	2
313	med	M313	2						1						1							1		2	5	1	1	4	2	4	2	4	3	2	2
314	med	M314	2	23					1						1							1		3	2	3	1	4	2	4	3	2	1	3	2
315	med	M315	2	23					1			1										1		2	1	1	1	4	2	4	1	5	2	2	3
316	med	M316	2	24					1						1			1						3	3	2	2	5	4	5	1	2	3	4	2
317	med	M317	2	24				1							1							1		3	1	1	1	4	1	4	5	2	2	2	1
318	med	M318	2					1					1									1		1	1	1	1	3	1	5	1	3	1	1	5
319	med	M319	2	25				1							1					1		1		2	2	2	1	5	2	5	2	1	2	3	1
320	med	M320	2	24					1						1								1	3	2	2	1	5	2	2	1	2	1	3	2
321	med	M321	2	25				1							1							1		3	3	2	1	5	3	5	2	4	3	2	1
322	med	M322	2	24					1						1							1		2	4	3	1	4	2	4	5	2	2	3	1
323	med	M323	2	23					1						1				1					2	3	2	1	5	3	4	2	2	2	2	2
324	med	M324	2	23					1						1					1				2	3	2	1	4	3	4	3	3	3	2	1
325	med	M325	2	25					1			1										1		2	1	1	1	3	2	3	2	4	3	2	1
326	med	M326	2	23				1							1							1		3	3	2	1	3	2	3	1	4	3	3	1
327	med	M327	2	25				1							1							1		2	1	2	2	4	1	5	2	2	3	2	1
328	med	M328	2	23				1					1									1		2	2	2	1	5	1	5	2	3	1	2	1
329	med	M329	2	23				1							1			1						3	2	1	1	4	2	4	2	2	3	3	2
330	med	M330	2	23					1			1						1						2	1	1	1	5	1	5	2	5	1	2	1
331	med	M331	2	24					1						1					1				2	2	2	1	4	2	4	2	3	2	2	4
332	med	M332	2	27					1						1							1		3	3	1	1	3	4	3	1	4	2	1	2
333	med	M333	2	23					1						1							1		2	1	1	1	5	1	5	1	2	1	1	1
334	med	M334	2	23					1						1							1		2	2	2	1	4	2	4	2	1	2	2	5
335	med	M335	2	24					1						1							1		2	3	2	2	4	2	4	2	3	2	2	2
336	med	M336	2	23				1							1			1						2	2	2	1	5	2	5	2	3	2	2	1
337	med	M337	2	23					1						1							1		2	3	1	1	5	2	5	2	3	1	2	2
338	med	M338	2	26				1							1			1						3	2	2	1	4	3	5	1	4	3	2	2
339	med	M339	2	24					1						1					1				2	2	1	1	5	2	5	1	4	2	1	1
340	med	M340	2	28					1						1							1		2	1	1	1	3	1	3	1	3	2	2	1
341	med	M341	2	25					1						1					1				2	4	2	1	4	1	3	1	4	3	2	4
342	med	M342	1	22				1							1							1		3	3	1	1	4	4	3	3	3	3
343	med	M343	1	22				1							1			1						3	3	2	1	4	3	4	4	4	2
344	med	M344	1	25				1							1			1						4	4	2	1	5	3	5	3	3	3
345	med	M345	1	25				1							1							1		4	5	3	1	5	4	5	2	3	3
346	med	M346	1	22					1						1							1		3	2	1	1	4	2	4	2	4	3
347	med	M347	1	25					1						1			1				1		3	3	1	1	5	3	5	3	3	3
348	med	M348	1	24					1						1							1		3	4	1	1	5	3	4	1	4	3
349	med	M349	1	23				1							1				1					3	4	3	1	3	4	4	2	3	3
350	med	M350	1	23					1						1							1		2	2	2	1	4	3	4	2	2	2
351	med	M351	1	21				1							1			1	1					3	3	2	1	4	3	4	2	3	3
352	med	M352	1	22				1							1				1					2	2	1	2	4	3	4	1	5	2
353	med	M353	1	22					1						1							1		2	2	2	1	3	3	4	3	3	3
354	med	M354	1	0					1						1							1		1	1	1	4	5	3	5	1	2	1
355	med	M355	1	22					1						1			1						3	4	2	3	4	3	3	3	3	3
356	med	M356	1	24					1						1							1		2	4	2	1	5	4	4	4	2	2
357	med	M357	1	23				1							1							1		3	4	2	1	5	4	4	4	4	2
358	med	M358	1	25					1			1										1		4	4	1	1	5	3	4	3	2	4
359	med	M359	1	27				1					1	1								1		3	4	1	1	5	3	5	2	4	3
360	med	M360	1	22					1						1							1		4	2	4	1	4	4	3	2	4	3
361	med	M361	1	24				1							1							1		3	4	2	1	4	3	4	2	3	3
362	med	M362	1	22					1						1			1						3	3	2	4	2	4	3	2	2	3
363	med	M363	1	21					1						1							1	1	3	4	2	2	3	3	3	4	2	3
364	med	M364	1	23				1							1							1		3	3	2	2	4	4	4	2	2	3
365	med	M365	1	26				1							1					1		1		3	2	1	1	5	2	4	2	2	2
366	med	M366	1						1						1					1				3	4	1	1	4	4	4	1	3	3
367	med	M367	1	27					1					1								1		3	4	2	1	4	4	5	1	5	3
368	med	M368	1	22				1							1			1						3	4	1	1	5	4	3	2	4	3
369	med	M369	1	21					1						1			1						3	2	2	1	3	2	3	2	4	3
370	med	M370	1	24				1							1						1			3	2	4	1	5	2	4	2	3	3
371	med	M371	1	23				1							1				1				1	5	5	5	1	3	3	4	2	3	3
372	med	M372	1	22				1							1			1						3	2	3	1	4	3	4	3	3	2
373	med	M373	1	21				1							1							1		4	4	3	2	5	3	4	2	4	3
374	med	M374	1	33				1					1									1		2	3	2	1	5	2	5	2	2	2
375	med	M375	4	25				1							1							1		2	2	1	1	4	4	4	1	4	3
376	med	M376	1	22				1							1							1		3	4	2	1	5	3	4	2	3	3
377	med	M377	1	23				1							1			1				1		5	4	1	1	4	4	4	4	2	3
378	med	M378	1						1						1					1		1	1	4	4	2	1	5	4	5	3	4	3
379	med	M379	1	28				1							1							1		5	5	1	1	5	5	5	3	3	3
380	med	M380	1						1						1							1		3	4	2	1	2	2	4	3	2	2
381	med	M381	1	22					1						1			1						3	3	1	1	1	3	1	1	3	3
382	med	M382	1	22				1							1					1				3	3	3	1	5	4	5	3	3	3
383	med	M383	1	23				1							1					1		1		3	4	3	2	2	3	4	3	3	3
384	med	M384	1	23					1						1					1		1		3	2	1	1	5	2	5	2	4	1
385	med	M385	1	22					1						1							1		3	3	1	1	4	3	4	1	3	3
386	med	M386	1	24					1						1							1		4	4	1	1	4	3	4	2	4	3
387	med	M387	1	24				1							1			1						3	4	1	1	5	3	4	1	4	3
388	med	M388	1	26				1							1							1		3	2	1	1	5	3	5	1	4	3
389	med	M389	1	22					1						1					1		1		3	3	1	1	4	3	4	4	3	2
390	med	M390	1	22					1						1							1		3	3	1	2	4	3	4	3	3	3
391	med	M391	1	25					1						1							1		3	4	2	2	4	3	3	1	3	3
392	med	M392	1	25				1							1			1				1		3	4	2	2	4	4	4	2	3	3
393	med	M393	1	26				1					1											3	4	2	1	4	3	4	1	2	3
394	med	M394	1	21					1						1					1				3	1	1	1	5	4	5	3	4	3
395	med	M395	1						1						1							1		3	3	1	1	5	2	3	1	5	2
396	med	M396	1	22					1						1							1		3	1	2	3	5	2	5	1	2	1
397	med	M397	1	25					1						1							1		3	2	3	1	5	1	5	2	3	2
398	med	M398	1	23				1							1					1				3	3	3	1	5	3	5	3	3	3
399	med	M399	1	23				1							1							1		2	3	3	1	4	3	4	1	4	3
400	med	M400	1	24					1			1										1		3	2	2	1	4	3	4	3	5	3
401	med	M401	1	22				1							1			1						3	4	1	1	4	4	4	3	3	3
402	med	M402	1	23					1			1											1	3	5	3	1	5	3	5	3	3	3
403	med	M403	1	23				1							1			1						3	3	3	1	5	3	4	2	3	3
404	med	M404	1	25				1							1							1		1		1	1	4	2	4	1	4	2
405	med	M405	4	31					1						1			1						4	4	4	2	5	4	5	2	2	3
406	med	M406	1						1						1							1		3	4	4	2	4	3	4	3	3	3
407	med	M407	1	21					1						1			1					1	3	4	1	2	4	3	5	3	2	3
408	med	M408	1	22				1							1			1						4	4	2	2	4	4	4	4	1	3
409	med	M409	1	24				1							1							1		4	4	5	2	4	4	4	3	4	3
410	med	M410	1	25				1							1							1		4	4	1	1	5	4	5	4	3	3
411	med	M411	1	27					1						1			1				1		3	2	2	1	4	2	4	3	3	3
412	med	M412	1	23					1						1							1		4	4	1	1	5	4	4	1	2	3
413	med	M413	1	22					1						1							1		3	3	1	1	5	2	5	2	4	3
414	med	M414	1	23					1						1							1		3	3	1	1	4	3	4	3	3	3
415	med	M415	1	22					1						1			1						3	4	4	2	3	3	3	4	2	3
416	med	M416	1	24					1			1										1		3	3	3	1	5		5	1	2	3
417	med	M417	1	26				1						1								1		3	3	1	1	5	3	5	2	4	3
418	med	M418	1	23				1							1							1		3	4	2	1	4	3	4	1	4	2
419	med	M419	1						1						1								1	3	3	3	3	3	3	3	3	3	3
420	med	M420	1	24				1						1								1		3	1	1	1	5	2	5	3	4	3
421	med	M421	1						1						1							1		3	4	1	2	5	3	5	3	2	3
422	med	M422	1	24					1						1							1		3	4	1	1	4	3	4	2	3	3
423	med	M423	1	23				1							1							1		5	5	3	1	3	5	3	3	4	3
424	med	M424	1	25				1					1									1		3	4	3	1	5	4	5	3	4	3
425	med	M425	1	25					1						1							1		3	4	4	1	5	3	5	2	3	3
426	med	M426	1	24					1						1							1		3	2	1	1	4	3	5	2	2	3
427	med	M427	1	23				1					1									1		4	4	1	1	5	5	3	2	3	3
428	med	M428	1	23				1							1							1		3	3	1	1	5	3	4	2	2	2
429	med	M429	1	23				1							1							1		5	5	1	1	5	3	5	2	5	2
430	med	M430	1	21					1						1					1		1		3	1	1	1	5	3	5	1	4	3
431	med	M431	1	23				1							1			1						3	5	5	1	4	2	4	5	5	5
432	med	M432	1						1						1					1				3	4	1	1	4	2	4	2	3	2
433	med	M433	1	22					1						1			1						3	5	1	1	4	4	3	2	4	3
434	med	M434	4						1					1						1				3	3	2	1	3	2	3	2	4	4
435	med	M435	1	29				1						1								1		3	2	1	1	5	1	4	1	3	3
436	med	M436	1	22					1						1							1		3	3	2	2	5	4	2	2	2	3
437	med	M437	1	23					1			1										1		4	2	1	1	5	4	3	1	4	3
438	med	M438	1	24					1						1					1		1		2	5	1	1	5	3	5	3	1	3
439	med	M439	1	23				1							1			1						3	3	2	2	4	4	4	2	3	3
440	med	M440	1	25				1							1					1				3	4	1	2	4	3	4	3	2	3
441	med	M441	1	27					1						1			1						2	3	2	1	3	2	2	3	2	2
442	med	M442	1	23					1						1				1	1				3	2	1	2	5	3	5	3	3	3
443	med	M443	1	22					1						1							1		3	4	1	1	4	4	4	3	3	3
444	med	M444	1	23					1						1			1						5	4	2	1	4	4	5	2	5	3
445	med	M445	1	23					1						1			1						3	2	1	1	4	2	4	2	4	3
446	med	M446	1	24					1						1			1						3	3	2	1	4	3	4	3	3	3
447	med	M447	1	23				1							1			1						3	3	1	1	3	2	2	2	3	3
448	med	M448	1	22					1						1							1		3	2	2	1	4	3	4	2	4	2
449	med	M449	1	24				1							1			1			1	1		3	4	3	1	4	4	4	4	3	3
450	med	M450	1	22					1						1							1		3	1	1	1	2	3	2	1	2	3
451	med	M451	1	23				1							1				1					4	5	1	1	5	3	4	2	3	3
452	med	M452	1	23					1						1							1		3	4	1	1	3	3	3	2	2	3
453	med	M453	1	22				1							1					1				3	3	1	1	5	4	5	2	4	4
454	med	M454	1					1							1							1		2	1	1	1	4	3	3	1	5	3
455	med	M455	1	23				1							1							1		3	3	2	1	4	3	4	2	2	3
456	med	M456	1	24					1			1						1					1	3	4	1	1	5	3	5	2	2	3
457	med	M457	1	24					1						1							1		3	4	2	2	4	2	4	3	4	3
458	med	M458	1	25					1						1			1						3	3	2	2	4	3	2	3	3	3
459	med	M459	1	24				1							1					1				3	4	3	1	4	3	5	2	4	3
460	med	M460	1	23					1						1							1		3	5	1	1	5	4	5	1	5	3
461	med	M461	1	24				1							1			1						3	4	3	1	5	4	4	2	2	3
462	med	M462	1	24					1						1							1		5	4	1	1	5	5	5	2	2	3
463	med	M463	1	22					1						1					1				3	4	2	1	3	1	3	2	2	2
464	med	M464	1	23					1						1				1					5	5	5	1	5	5	5	1	2	3
465	med	M465	1	22					1						1			1						3	2	4	1	5	3	5	3	3	3
466	med	M466	1	23				1							1							1		3	3	2	1	4	3	4	2	2	3
467	med	M467	1	25				1							1			1						4	4	3	1	4	4	4	4	3	3
468	med	M468	1	26					1						1							1		3	2	2	1	5	2	3	3	3	2
469	med	M469	1					1							1							1		3	3	3	1	4	2	4	3	2	2
470	med	M470	1	25					1						1					1				1	3	1	3	5	3	5	3	3	2
471	med	M471	1						1						1				1					3	3	1	1	3	4	4	1	2	3
472	med	M472	1	24					1						1							1		3	4	2	2	5	3	5	4	3	3
473	med	M473	1	25					1						1							1		3	3	1	1	4	2	4	1	3	3
474	med	M474	1	24					1						1					1		1		3	2	1	1	4	3	4	3	3	3
475	med	M475	1	22				1							1			1						5	5
476	med	M476	1	25				1							1			1						3	4	3	2	2	3	3	3	3	3
477	med	M477	1	23				1							1			1						3	3	3	2	4	3	3	3	3	3
478	med	M478	1	24				1							1							1	1	3	2	3	1	4	3	4	2	3	3
479	med	M479	1	25					1						1							1		3	3	1	1	4	4	4	1	4	3
480	med	M480	1	22				1							1					1		1		3	5	2	1	4	3	3	4	4	3
481	med	M481	1	24				1							1				1					2	3	2	2	5	4	5	2	5	2
482	med	M482	1	23				1							1			1						3	3	3	1	5	4	5	3	3	4
483	med	M483	1	26					1						1							1			2		1	3	3	3	3	3	3
484	med	M484	1	23					1						1			1						3	3	2	2	4	3	4	2	4	3
485	med	M485	1	25					1						1							1		3	2	2	2	4	4	3	2	4	3
486	med	M486	1	24				1							1			1				1		4	4	2	1	4	5	5	3	3	3
487	med	M487	1	22					1						1							1		3	4	2	2	5	3	3	5	3	2
488	med	M488	1	22					1						1			1						2	2	2	2	4	3	4	2	3	2
489	med	M489	1	22					1						1				1					3	2	1	1	4	3	4	1	2	1
490	med	M490	1	27					1						1							1		3	3	1	1	5	2	5	2	3	3
491	med	M491	1	22				1							1			1			1			3	4	3	1	5	5	4	3	3	2
492	med	M492	1	25				1							1							1		3	2	2	1	5	3	5	2	2	3
493	med	M493	1	22				1							1			1						3	4	1	1	5	3	4	2	5	3
494	med	M494	1	24				1							1			1				1		3	3	2	1	3	3	3	1	3	2
495	med	M495	1	23				1							1							1		3	4	2	1	5	3	4	4	2	3
1	nur	N001	14	48				1							1							1		1	2	1	1	5	1	5	1	5	3	1	3
2	nur	N002	12	29				1					1									1		3	3	2	1	5	3	5	2	5	3	2	1
3	nur	N003	12	36				1							1							1		5	4	2	1	5	3	5	2	4	4	2	1
4	nur	N004	11	18				1							1							1		2	4	2	2	4	3	4	2	3	2	2	4
5	nur	N005	13	47					1						1							1		2	3	1	1	4	3	4	2	4	3	1	2
6	nur	N006	13	27				1			1											1		2	5	1	1	2	4	4	2	2	2	2	1
7	nur	N007	14	30				1							1				1	1				2	2	2	2	4	2	4	2	4	3	2	2
8	nur	N008	14	53				1							1				1					1	1	1	1	5	4	5	1	5	2	1	2
9	nur	N009	14	33					1			1								1				3	3	1	1	5	3	5	1	4	3	2	1
10	nur	N010	11	21					1						1				1			1		1	1	1	1	5	1	5	1	3	1	2	3
11	nur	N011	13	30				1							1							1		2	2	1	1	5	1	5	2	5	2	1	4
12	nur	N012	13	37				1							1							1		4	4	1	1	5	2	5	2	5	2	1	1
13	nur	N013	14	25				1							1							1		3	2	2	2	5	3	5	2	5	3	3	2
14	nur	N014	11	20				1							1							1		2	3	2	1	4	2	4	2	4	2	2	1
15	nur	N015	12	24				1							1							1		3	3	2	2	4	3	4	2	4	3	2	2
16	nur	N016	11	19				1							1			1						4	5	2	1	3	5	3	2	3	4	3	1
17	nur	N017	11	19				1							1							1		3	3	1	1	4	2	4	1	5	3	2	1
18	nur	N018	11	21				1					1							1				2	2	1	1	2	3	2	1	4	2	2	2
19	nur	N019	13	25				1							1							1		3	2	1	2	3	3	3	2	4	2	2	2
20	nur	N020	13	32				1							1							1		3	3	2	1	5	2	5	1	5	3	2	1
21	nur	N021	13	25				1					1									1		2	4	1	1	4	2	4	2	2	2	2	2
22	nur	N022	11	21					1			1										1		3	3	2	2	2	3	3	3	2	3	2	3
23	nur	N023	12	25				1							1					1		1		5	2	2	1	5	4	5	1	4	4	2	1
25	nur	N024	13	32				1							1							1		2	3	2	1	4	2	4	2	4	3	2	1
26	nur	N025	11	21				1					1									1		2	4	2	2	5	2	5	4	3	2	2	2
27	nur	N026	13	22				1							1			1						1	1	1	1	1	1	3	1	3	1	1	1
28	nur	N027	12	27					1			1										1		2	2	1	1	5	2	5	1	5	3	1	1
29	nur	N028	11	20				1							1							1		2	2	1	1	5	1	5	2	2	2	1	2
31	nur	N029	11	18					1			1										1		1	1	1	1	5	1	5	1	5	1	1	2
32	nur	N030	13	33				1							1							1		3	4	4	1	5	3	2	2	2	3	3	1
33	nur	N031	11	18				1							1			1						3	3	2	1	4	3	4	3	4	3	2	3
34	nur	N032	12	26				1			1			1								1		2	1	1	1	5	2	5	1	5	3	1	1
35	nur	N033	13	22				1						1						1		1		4	2	1	1	5	4	5	1	4	3	1	1
36	nur	N034	13	25				1						1	1							1		2	1	1	1	4	4	4	2	4	2	2	1
37	nur	N035	13	24				1			1			1								1		3	2	1	1	5	3	5	1	5	3	1	1
38	nur	N036	11	20				1							1							1		2	2	2	2	4	2	4	3	3	2	2	2
39	nur	N037	13	23				1					1									1		3	2	2	1	4	4	4	2	4	3	2	1
40	nur	N038	12	28				1			1	1		1								1		5	5	1	1	5	4	5	1	5	5	1	1
41	nur	N039	12	27				1						1				1						4	2	1	1	5	4	5	1	5	4	1	1
42	nur	N040	13	37				1							1							1		2	2	2	1	5	2	5	2	4	2	1	2
43	nur	N041	12	23				1							1							1		2	4	1	1	5	2	5	2	5	2	2	1
44	nur	N042	11	20				1							1							1		2	1	2	1	5	1	5	3	4	1	1	2
45	nur	N043	13	26				1							1							1		2	4	2	1	5	2	4	2	2	4	2	2
46	nur	N044	11	21				1							1							1		2	4	2	1	5	3	5	3	1	2	3	1
47	nur	N045	13	32				1							1				1					2	3	2	1	5	1	5	3	2	2	2	3
48	nur	N046	13	24				1							1					1				2	2	2	2	5	2	4	1	4	2	2	2
49	nur	N047	11	20					1			1						1						3	3	1	1	5	1	5	4	4	4	3	1
50	nur	N048	11	20				1					1	1					1					3	4	1	1	5	2	4	3	4	3	2	1
51	nur	N049	12	27				1						1								1		4	2	2	1	4	5	3	2	4	5	4	1
52	nur	N050	12	28					1			1										1		3	2	1	1	5	2	5	2	5	3	1	1
53	nur	N051	12	26				1							1							1		2	2	1	1	5	2	5	2	2	3	2	2
54	nur	N052	11	18					1						1			1						3	3	3	3	3	3	3	3	3	3	3	3
55	nur	N053	11	18					1				1									1		3	2	1	1	2	3	2	3	2	1	1	2
56	nur	N054	11	26					1			1										1		2	3	1	1	5	3	5	2	5	1	1	2
57	nur	N055	11	20				1							1							1		2	2	2	2	2	2	4	2	2	2	4	2
58	nur	N056	11	18				1							1							1		2	3	1	1	4	2	4	1	3	2	1	1
59	nur	N057	11	20				1							1					1				2	3	1	2	5	3	5	1	5	2	1	2
60	nur	N058	13	24				1							1							1		3	2	1	1	5	3	5	2	4	3	4	1
61	nur	N059	11	20				1							1			1						2	3	2	2	3	2	3	3	3	2	2	2
62	nur	N060	11	19				1					1									1		2	3	1	1	5	4	5	3	5	2	1	1
63	nur	N061	13	34				1			1											1		3	4	1	1	4	3	4	2	4	3	2	2
64	nur	N062	11	19				1							1							1		4	2	2	1	4	4	4	2	3	3	4	1
65	nur	N063	13	29				1							1			1						2	2	2	2	5	3	5	1	5	2	2	2
66	nur	N064	13	26					1						1							1		3	3	1	1	5	2	5	1	4	1	2	1
67	nur	N065	13	32				1							1							1		1	1	1	2	5	1	5	1	3	1	2	4
68	nur	N066	13	31				1							1							1		2	2	3	2	4	2	4	2	3	2	2	4
69	nur	N067	12	27			1							1								1		5	3	1	1	4	5	4	2	5	4	1	1
70	nur	N068	11	21				1							1							1		2	4	1	1	4	3	4	4	2	2	3	1
71	nur	N069	11	19				1							1							1		2	2	2	1	4	2	4	5	4	2	3	2
72	nur	N070	12	34					1						1							1		4	3	3	1	5	5	5	2	2	4	3	1
73	nur	N071	12	28				1						1								1		3	1	2	1	4	3	4	2	4	4	2	1
74	nur	N072	11	19					1						1							1		1	1	1	2	4	1	3	1	4	1	2	3
75	nur	N073	13	26				1							1							1		2	2	2	1	5	3	5	2	2	2	2	4
76	nur	N074	11	19					1						1								1	2	3	2	2	4	2	4	2	3	2	2	2
77	nur	N075	12	26				1							1							1		5	4	2	1	5	4	5	1	5	4	2	1
78	nur	N076	13	25				1							1							1		2	2	2	2	5	2	4	2	3	1	3	2
79	nur	N077	11	19				1							1							1		1	1	1	1	5	1	5	1	3	1	1	1
80	nur	N078	13	27				1							1							1		1	2	1	1	4	2	4	1	4	1	1	1
81	nur	N079	13	31					1						1							1		3	2	1	1	4	3	4	2	4	3	2	5
96	nur	N080	11	19					1			1							1					3	2	1	3	4	2	4	1	3	2	2	1
97	nur	N081	11	20				1							1							1		1	3	1	2	5	2	5	1	1	4	1	1
99	nur	N082	11	2				1							1					1				2	2	2	1	5	1	4	2	2	2	2	1
100	nur	N083	13	34					1			1										1		2	2	2	2	2	2	2	2	2	2	2	2
101	nur	N084	11	20				1							1							1		2	2	2	1	5	2	5	2	2	1	3	2
102	nur	N085	11	19				1							1							1		2	2	3	1	4	2	4	2	3	1	3	1
103	nur	N086	13	35				1							1							1		4	4	2	1	4	4	4	2	5	3	2	2
104	nur	N087	11	20				1							1					1				2	4	3	1	5	1	5	4	2	2	3	1
105	nur	N088	11	19				1							1			1						3	4	2	2	4	4	3	3	3	2	3	2
106	nur	N089	11	20				1							1					1				4	3	1	1	5	3	5	2	2	3	1	4
108	nur	N090	11	18				1					1									1		2	2	2	2	3	2	2	2	3	2	2	2
109	nur	N091	14	50				1							1							1		3	3	2	2	4	3	4	1	4	3	2	2
110	nur	N092	14	35					1			1										1		4	1	1	1	4	3	4	1	5	3	2	1
111	nur	N093	11	19				1							1					1		1		2	1	1	2	5	1	4	1	5	1	2	3
112	nur	N094	13	24				1							1							1		1	4	2	1	5	4	5	1	4	3	2	1
113	nur	N095	14	25				1							1							1		2	3	2	1	5	2	4	3	2	3	3	1
114	nur	N096	11	21					1						1							1		2	3	2	2	4	2	4	3	4	3	3	3
115	nur	N097	12	33				1							1					1		1		3	2	1	1	5	4	4	1	4	3	1	1
116	nur	N098	13	25				1						1								1		2	3	1	1	4	3	4	2	4	2	1	2
117	nur	N099	11	23				1							1				1	1				5	5	1	1	5	4	5	1	5	4	2	1
118	nur	N100	13	29				1							1							1		1	1	1	1	5	1	5	2	5	1	1	2
119	nur	N101	13	28				1							1							1		2	3	2	1	5	2	4	1	5	2	2	1
120	nur	N102	12	23				1							1			1						2	2	1	1	5	2	4	2	2	2	3	1
121	nur	N103	11	20				1							1							1		1	3	1	1	4	1	4	2	4	1	1	2
122	nur	N104	12	30				1			1											1		1	3	1	1	5	1	5	1	5	1	1	1
123	nur	N105	12	27				1							1							1		4	2	1	1	5	2	5	1	5	4	1	1
124	nur	N106	13	39				1							1							1		4	3	2	1	5	3	5	2	2	3	4	1
125	nur	N107	13	47				1							1							1		3	3	2	2	4	3	4	2	4	2	2	3
130	nur	N108	12	27				1					1	1	1					1		1		3	3	1	1	4	3	4	3	3	3	2	1
131	nur	N109	11	20				1							1							1		3	3	3	1	5	3	5	2	5	2	3	1
132	nur	N110	11	20				1							1							1		2	4	3	2	4	4	4	4	2	3	3	2
134	nur	N111	11	18				1							1							1		3	3	1	1	4	3	4	2	4	2	2	1
150	nur	N112	11	21				1							1							1		2	2	2	5	4	2	4	1	4	2	2	3
151	nur	N113	12	25				1							1							1		3	3	2	1	4	3	4	1	3	3	1	2
157	nur	N114	11	19				1							1							1		2	2	1	1	5	3	5	2	4	3	1	1
159	nur	N115	11	20				1							1							1		2	2	2	3	4	2	4	2	3	3	2	2
160	nur	N116	12	25				1						1									1	5	3	1	1	5	4	5	2	3	3	2	1
161	nur	N117	12	27					1				1									1		3	4	2	2	4	3	2	2	5	2	2	1
162	nur	N118	12	28				1							1					1				5	5	1	1	5	5	5	1	4	4	1	1
163	nur	N119	12	25					1						1							1		3	5	2	1	5	4	4	2	2	3	2	1
164	nur	N120	12	27				1							1							1		4	5	2	1	5	3	5	2	3	4	3	1
165	nur	N121	12					1							1							1		4	5	2	1	5	3	5	2	3	4	3	1
166	nur	N122	12	25				1														1		3	3	2	1	5	4	5	1	3	3	3	2
167	nur	N123	12	22				1					1									1		4	2	3	1	5	2	5	4	2	4	4	1
168	nur	N124	12	26				1							1							1		2	1	1	1	5	2	5	2	3	2	3	2
169	nur	N125	11	21				1							1							1		1	3	2	4	5	1	5	2	3	1	1	4
170	nur	N126	12	26				1							1							1		3	4	3	3	5	4	4	4	2	4	3	1
171	nur	N127	14	38				1					1							1		1		4	4	2	1	5	2	5	1	2	4	2	1
172	nur	N128	11	20				1							1							1		3	4	2	1	5	2	5	2	4	3	2	2
173	nur	N129	13	25				1							1							1		2	4	2	2	4	3	4	2	2	2	2	2
175	nur	N130	13	22				1								1		1						2	3	1	1	5	4	3	3	4	2	1	1
176	nur	N131	12	26				1					1		1							1		2	2	2	1	4	2	5	1	4	2	1	1
177	nur	N132	12	26					1	1		1		1								1		4	5	1	1	4	4	4	1	4	3	1	1
178	nur	N133	12	25				1						1						1		1		5	4	1	1	4	4	4	1	4	2	1	1
179	nur	N134	12	26			1	1					1									1		5	2	1	1	5	4	5	1	5	5	1	1
180	nur	N135	12	33					1			1								1		1		2	3	2	2	4	1	3	2	4	2	2	2
181	nur	N136	12	26				1							1							1		4	2	2	1	5	3	5	1	5	3	2	2
182	nur	N137	12	30				1							1							1		3	4	2	2	5	4	5	4	2	3	2	2
183	nur	N138	12	24				1							1				1
184	nur	N139	13	26				1							1							1		3	2	3	1	5	4	5	1	5	3	3	2
185	nur	N140	12	26				1							1				1	1				2	3	2	1	4	2	2	2	2	2	2	4
187	nur	N141	11	21				1			1											1		4	5	1	1	5	2	5	1	5	2	1	2
188	nur	N142	11	19				1							1							1		1	1	1	1	5	1	5	2	2	1	2	1
189	nur	N143	11	19				1							1							1		4	4	2	1	4	3	5	1	3	3	3	1
190	nur	N144	11	19					1						1			1						1	1	1	1	4	2	3	1	2	1	1	1
192	nur	N145	14	46				1							1							1		5	5	1	1	5	4	5	4	5	3	3	2
193	nur	N146	14	27				1							1							1		3	3	2	2	4	2	4	2	4	3	2	1
194	nur	N147	11	18				1							1							1		3	4	1	1	3	3	3	1	5	3	2	1
195	nur	N148	12	29				1							1			1						4	3	2	1	5	4	4	2	4	3	2	2
196	nur	N149	12	25					1				1									1		4	4	2	1	5	4	4	2	4	4	2	2
197	nur	N150	11	18				1							1					1		1		4	4	1	1	5	5	5	1	5	3	1	1
198	nur	N151	12	27				1							1							1		4	5	4	1	4	4	4	2	2	3	5	1
199	nur	N152	13	38					1				1								1			3	3	1	1	4	3	4	2	4	3	2	2
200	nur	N153	11	21				1					1									1		3	3	1	1	5	4	5	2	3	2	1	1
201	nur	N154	11	19				1							1							1		3	2	2	1	5	2	5	1	3	2	2	1
202	nur	N155	11	19				1							1							1		2	2	2	2	4	2	3	3	4	2	2	3
203	nur	N156	12	30				1							1							1		3	2	1	1	5	2	5	1	4	2	1	1
204	nur	N157	11	20				1					1		1			1						3	4	3	1	4	2	4	2	2	3	4	2
205	nur	N158	11	18				1							1					1				3	3	3	2	4	3	4	2	4	3	3	1
206	nur	N159	13	25				1							1							1		1	2	1	1	4	2	4	1	4	1	2	1
207	nur	N160	12	27				1							1							1		2	2	1	1	4	2	3	1	4	3	2	2
208	nur	N161	11	18				1							1				1			1		1	1	5	1	4	3	4	2	3	1	2	2
209	nur	N162	11	20				1							1			1						2	4	2	2	4	2	4	4	2	2	2	2
210	nur	N163	11	19				1							1							1		2	3	2	1	4	1	5	1	5	2	2	4
211	nur	N164	11	20				1							1							1		2	4	2	2	4	2	4	2	4	2	2	2
212	nur	N165	11	21				1							1							1		2	3	2	1	4	1	4	1	4	2	3	2
213	nur	N166	12	34				1							1					1				4	4	1	1	4	4	4	1	4	2	1	1
214	nur	N167	12	28				1							1							1		4	1	1	1	4	4	4	1	5	4	1	1
215	nur	N168	11	21				1							1				1					4	2	2	1	5	2	5	2	4	2	3	1
216	nur	N169	13	29				1							1							1		2	4	1	1	5	3	5	2	3	3	2	2
217	nur	N170	13	28				1							1							1		2	2	1	1	4	2	4	1	4	2	1	3
218	nur	N171	12	27				1						1						1				2	1	1	1	4	4	4	1	4	4	4	1
219	nur	N172	14	27				1					1							1				3	4	2	1	5	3	5	3	5	3	2	1
220	nur	N173	13	28				1							1							1		2	2	1	1	4	3	3	2	5	2	1	3
221	nur	N174	14	23				1							1							1		2	2	2	1	5	4	4	2	5	2	2	2
223	nur	N175	12	24				1							1							1		2	4	2	1	4	2	2	2	4	2	3	1
224	nur	N176	13	25					1			1										1		3	2	2	2	4	2	4	2	4	2	2	1
225	nur	N177	13	30				1			1											1		2	3	2	1	4	2	4	3	4	2	3	1
226	nur	N178	13	26				1							1							1		2	2	1	1	5	2	5	1	4	2	2	3
227	nur	N179	13	24				1							1							1		2	3	2	1	4	2	4	3	3	2	2	2
228	nur	N180	13	29					1						1			1						3	4	2	2	4	3	4	2	3	3	2	2
229	nur	N181	11	21				1							1					1				4	2	2	2	4	3	4	1	4	2	2	1
230	nur	N182	11	22				1							1							1		2	3	1	2	4	1	4	2	3	2	2	4
231	nur	N183	13	27				1							1	1		1			1			3	3	2	2	3	3	3	3	3	3	2	2
233	nur	N184	12	25				1					1									1		4	4	1	1	5	4	5	1	5	2	1	1
238	nur	N185	14	25				1							1							1		2	2	2	1	4	1	4	2	3	3	2	2
241	nur	N186	13	33				1							1							1		2	3	1	1	5	3	5	1	4	1	1	2
244	nur	N187	12	26				1							1							1		5	4	2	1	5	4	5	1	2	4	2	1
248	nur	N188	14	28				1							1							1		4	3	1	1	3	3	3	3	2	3	3	2
256	nur	N189	14	28					1				1					1						4	3	1	1	5	4	5	1	5	3	1	1
258	nur	N190
260	nur	N191	14	30				1							1							1		1	2	2	1	5	2	5	2	5	2	2	1
263	nur	N192	13	25				1							1							1		4	3	2	2	4	4	4	2	2	2	3	4
264	nur	N193	13	26				1							1							1		3	4	1	1	3	4	3	2	2	2	1	3
265	nur	N194	13	25					1						1			1						3	3	2	1	4	4	4	2	3	2	2	2
266	nur	N195	13	26				1							1							1		3	2	2	2	5	3	4	2	3	3	3	2
267	nur	N196	13	26				1							1							1		3	3	2	2	4	3	4	1	3	3	2	2
268	nur	N197	13	27				1							1							1		2	2	1	1	4	4	4	2	5	1	1	2
269	nur	N198	13	34					1						1							1		2	3	2	2	4	2	4	2	4	3	2	2
270	nur	N199	13	26				1							1							1		4	5	1	1	4	4	4	1	3	3	3	3
271	nur	N200	13	33				1							1			1												1	1	2			2
272	nur	N201	13	32				1							1					1				1	1	1	1	5	1	4	2	4	1	1	1
273	nur	N202	13	26				1							1			1						4	4	2	1	4	4	5	4	3	2	2	2
274	nur	N203	13	29					1						1							1		3	3	1	1	5	3	4	2	4	2	2	3
275	nur	N204	13	29				1							1					1				2	4	1	1	5	3	4	2	4	2	2	1
276	nur	N205	13	34					1			1										1		3	4	1	1	3	5	3	1	5	3	2	3
277	nur	N206	11	18					1						1			1				1		3	3	3	2	3	2	3	5	3	3	2	4
278	nur	N207	11	18				1							1							1		2	2	2	1	4	2	3	1	4	3	3	3
279	nur	N208	11	18				1							1							1		3	2	1	1	4	3	4	1	4	1	1	2
280	nur	N209	11	18				1							1							1		3	2	1	1	5	2	5	1	4	1	1	1
281	nur	N210	11	18				1					1									1		3	3	1	1	5	3	5	1	5	3	1	3
282	nur	N211	11	20				1							1							1		2	4	2	2	5	2	3	4	4	2	2	4
283	nur	N212	11	18				1							1			1						2	2	2	1	5	2	4	3	3	2	3	2
284	nur	N213	11	18				1							1			1				1		3	2	1	1	4	2	3	1	2	3	1	1
285	nur	N214	11	18				1							1				1			1		1	1	1	1	5	1	4	2	4	1	2	1
286	nur	N215	11	19				1							1							1		3	3	2	1	3	3	3	4	3	3	3	1
287	nur	N216	11	19					1			1										1		3	2	1	1	3	3	3	2	2	2	1	2
288	nur	N217	11	19				1							1			1						3	3	1	1	4	2	4	3	3	2	2	1
289	nur	N218	11	18				1							1							1		2	2	2	1	5	2	5	2	3	2	3	2
290	nur	N219	11	18				1							1							1		3	2	3	1	5	2	4	3	3	2	3	3
291	nur	N220	11	19				1							1					1				3	1	1	1	3	1	3	1	4	1	1	2
292	nur	N221	13	26				1					1									1		1	1	1	1	5	1	4	1	5	1	2	1
293	nur	N222	11	21				1							1							1		3	4	2	1	5	3	4	2	2	2	2	1
294	nur	N223	11	21				1							1							1		3	4	3	1	4	3	4	3	3	3	3	1
295	nur	N224	11	22				1							1			1						5	1	4	1	5	4	5	5	4	4	5	1
296	nur	N225	11	21				1							1							1		2	3	3	1	3	2	3	2	2	2	3	1
297	nur	N226	13	31				1							1							1		2	3	2	2	4	3	4	2	5	3	2	2
298	nur	N227	13	31					1													1		3	3	2	4	4	3	4	2	4	3	2	5
299	nur	N228	13	29				1							1							1		3	4	2	2	4	4	4	3	3	3	2	3
300	nur	N229	13	33				1							1							1		3	1	1	1	5	3	5	1	5	3	1	1
302	nur	N230	11	21				1							1							1		2	3	1	1	5	2	5	4	5	1	1	2
303	nur	N231	13	32				1							1							1		3	3	2	1	5	2	4	1	5	2	4	2
304	nur	N232	13	30				1							1				1					3	2	3	2	4	3	4	3	3	2	4	4
305	nur	N233	13	26				1							1							1		3	2	1	1	5	4	5	2	2	3	2	2
306	nur	N234	11	21				1							1							1		2	2	2	1	4	2	4	5	2	2	3	3
307	nur	N235	13	31				1							1							1		2	2	1	1	5	2	5	1	5	2	1	1
308	nur	N236	11	21				1							1							1		2	3	3	1	4	1	4	4	1	2	4	3
309	nur	N237	11	21				1							1			1						3	3	3	3	4	4	3	3	3	3	4	3
310	nur	N238	11	21				1							1							1		2	2	1	3	5	2	4	2	4	2	2	2
311	nur	N239	11	21				1							1							1		3	4	2	1	4	4	4	2	4	2	2	2
312	nur	N240	11	20				1							1				1					4	2	2	1	4	4	3	4	3	3	3	1
313	nur	N241	13	24				1							1							1		2	2	2	2	4	2	4	2	2	2	3	2
314	nur	N242	11	21				1							1							1		2	2	2	1	4	2	4	2	2	2	2	2
315	nur	N243	13	23				1							1							1		3	1	4	1	5	1	5	3	2	1	4	2
316	nur	N244	11	20				1							1							1		2	2	1	1	4	1	4	1	4	1	2	4
317	nur	N245	13	26				1							1							1		2	2	1	1	5	1	5	1	5	2	1	1
318	nur	N246	11	21				1							1							1		1	1	1	1	5	1	5	1	3	1	1	4
319	nur	N247	11	21				1							1							1		3	3	2	2	4	2	4	2	4	2	2	2
320	nur	N248	11	21				1							1							1		2	2	2	2	3	2	4	1	2	2	3	2
321	nur	N249	13	26				1							1							1		1	1	1	1	5	1	5	1	5	1	1	1
322	nur	N250	11	20				1							1							1		3	4	2	2	4	2	4	2	2	2	3	2
323	nur	N251	13	25				1					1									1		2	3	1	1	4	4	4	1	3	2	1	1
324	nur	N252	13	25				1							1				1					2	2	2	1	4	2	4	2	5	2	2	2
325	nur	N253	11	20				1							1							1		1	1	1	1	5	1	5	1	2	1	1	2
326	nur	N254	11	20				1							1			1						2	2	2	2	3	2	2	4	2	2	2	3
327	nur	N255	13	33				1							1							1		2	2	1	1	5	2	5	1	2	2	4	1
328	nur	N256	11	20				1							1							1		2	3	1	1	4	1	4	3	4	2	2	3
329	nur	N257	13	25				1							1							1		3	3	2	1	4	2	4	2	4	2	2	1
330	nur	N258	13	24				1							1							1		2	3	2	1	4	2	4	2	3	3	3	2
331	nur	N259	13	26				1							1							1		2	3	2	1	5	1	5	1	5	2	2	1
332	nur	N260	11	22				1							1			1						3	3	1	1	4	2	4	2	3	3	2	2
333	nur	N261	11	19						1			1										1	2	2	1	1	5	1	5	1	5	2	1	1
334	nur	N262	11	21				1							1			1						3	2	2	2	3	2	2	2	2	2	2	2
335	nur	N263	11	40				1							1			1						4	3	3	1	5	4	5	2	2	4	3	1
336	nur	N264	11	20				1							1			1						2	2	2	2	2	2	2	2	2	2	2	2
337	nur	N265	11	20				1							1							1		3	2	2	2	3	2	3	2	3	2	3	3
338	nur	N266	11	20				1							1				1					3	3	3	2	4	3	4	4	3	2	3	2
339	nur	N267	13	28				1							1							1		3	2	2	2	4	2	3	3	2	2	3	1
340	nur	N268	12	27				1							1							1		3	2	1	1	4	4	5	1	5	3	2	1
341	nur	N269	11	20				1							1							1		3	4	4	1	5	2	5	2	4	3	3	2
342	nur	N270	13	25				1					1					1						4	4	1	1	5	1	5	2	2	2	4	1
343	nur	N271	11	20				1							1							1		3	3	2	1	5	3	5	2	3	3	2	2
344	nur	N272	11	20				1							1					1		1		3	3	2	2	5	2	5	2	3	2	2	2
345	nur	N273	11	21				1							1			1						3	2	3	2	4	3	4	2	2	3	3	3
346	nur	N274	11	21				1							1							1		2	3	2	1	3	2	3	2	4	1	3	1
347	nur	N275	11	21				1							1							1		3	5	4	4	3	2	5	2	3	2	4	5
348	nur	N276	11	20				1							1							1		2	2	2	2	4	2	4	2	3	2	3	3
349	nur	N277	12	27				1							1							1		2	3	2	2	5	2	5	1	4	2	3	2
350	nur	N278	11	23				1							1			1						3	3	2	1	3	3	3	2	1	2	2	1
351	nur	N279	11	20				1							1							1		2	3	2	1	4	1	4	3	3	1	3	2
352	nur	N280	12	27				1							1							1		2	3	1	1	5	1	4	2	2	1	2	1
353	nur	N281	11	20				1							1							1		2	2	2	2	4	1	4	3	4	2	2	2
354	nur	N282	11	21				1							1							1		2	4	2	1	4	2	4	2	4	1	3	3
355	nur	N283	12	23				1							1							1		3	4	2	1	5	3	4	1	5	2	4	1
356	nur	N284	13	38					1						1							1		2	1	2	2	5	4	4	1	5	3	1	1
357	nur	N285	12	23				1							1			1		1				3	4	3	2	5	2	5	3	4	3	4	1
358	nur	N286	13	24				1							1							1		2	2	2	2	4	2	3	2	2	2	3	4
359	nur	N287	11	21				1							1			1				1		3	3	3	1	4	2	3	3	3	3	3	2
360	nur	N288	12	32				1							1							1		2	3	1	1	5	2	5	1	5	2	1	2
361	nur	N289	11	21				1							1							1		2	2	2	2	5	1	4	2	2	3	3	3
363	nur	N290	11	21				1							1				1	1		1		2	3	3	2	4	2	4	2	2	2	4	2
364	nur	N291	13	26				1							1							1		3	4	2	1	5	4	5	3	3	2	2	2
365	nur	N292	13	41				1							1							1		4	3	2	2	4	4	4	2	4	3	2	2
366	nur	N293	11	21				1							1			1						2	3	2	2	4	2	4	3	2	2	2	3
368	nur	N294	11	21				1							1							1		4	5	4	1	5	4	5	4	2	3	4	1
369	nur	N295	11	20				1							1							1		2	4	2	1	5	2	5	2	2	2	2	2
370	nur	N296	11	22				1							1				1					3	4	3	2	4	4	4	2	2	3	3	2
371	nur	N297	11	20				1							1							1		3	3	2	2	5	2	5	2	4	3	2	2
372	nur	N298	12	26				1							1							1		2	2	2	1	5	2	5	2	2	2	2	2
373	nur	N299	11	21				1							1							1		2	3	2	2	3	3	3	1	4	3	2	1
374	nur	N300	12	24				1							1							1		2	2	1	1	5	2	4	2	3	2	2	2
376	nur	N301	11	20					1						1			1						1	1	1	1	1	1	3	1	1	1	1	1
377	nur	N302	12	25				1							1				1					2	3	1	1	5	2	5	1	3	2	2	1
378	nur	N303	11	20				1							1							1		2	3	2	1	4	2	4	2	4	2	2	2
379	nur	N304	11	21				1							1			1						3	2	2	1	5	2	5	2	4	3	3	1
380	nur	N305	11	20				1							1				1					3	3	2	1	4	3	4	3	4	2	2	1
381	nur	N306	11	20				1							1			1						3	4	2	2	5	2	5	2	4	2	3	3
382	nur	N307	12	24				1							1				1					4	3	1	1	5	2	5	3	5	3	1	1
383	nur	N308	11	20				1							1							1		3	2	2	2	4	2	4	4	2	2	3	4
384	nur	N309	11	19				1							1							1		2	4	1	1	4	4	4	2	4	2	1	2
385	nur	N310	11	25				1									1			1		1	1	2	3	2	1	5	2	5	2	2	3	2	2
386	nur	N311	11	19				1							1			1						2	2	2	1	4	2	4	1	5	1	2	1
387	nur	N312	11	20				1							1							1		2	2	2	1	4	1	4	2	3	2	2	1
388	nur	N313	11	20				1							1				1					3	2	1	1	4	2	4	2	4	2	2	3
389	nur	N314	11	20				1							1					1				2	3	2	3	5	1	5	2	2	2	2	2
390	nur	N315	11	19				1							1							1		2	5	2	2	5	2	5	2	4	2	2	1
391	nur	N316	11	19				1							1							1		3	3	2	2	5	2	5	4	2	2	2	2
392	nur	N317	11	21				1							1			1						4	4	3	2	5	4	4	5	4	4	4	3
393	nur	N318	11	19				1							1							1		2	4	2	1	4	4	4	1	1	2	2	2
394	nur	N319	11	19				1							1							1		3	4	4	2	3	2	4	3	2	2	4	4
395	nur	N320	11	20				1							1							1		2	3	3	2	4	2	4	4	3	1	3	2
396	nur	N321	11	21				1							1							1		2	3	1	2	5	2	5	3	3	3	4	2
397	nur	N322	11	19				1							1							1		4	4	2	1	5	4	5	1	5	3	2	1
398	nur	N323	11	21				1							1			1						4	4	4	2	3	2	3	3	1	2	5	1
399	nur	N324	11	19				1							1					1				4	1	1	1	5	2	5	1	5	2	1	1
400	nur	N325	11	20				1							1							1		3	3	2	2	2	2	2	2	2	2	3	3
401	nur	N326	11	19				1							1			1						2	3	2	2	4	2	4	3	3	2	3	2
402	nur	N327	12	28				1							1			1	1	1		1	1	2	1	2	1	5	3	5	2	3	2	2	2
403	nur	N328	11	19				1							1							1		2	4	2	1	4	1	4	3	2	2	3	1
404	nur	N329	11	20				1							1							1		2	2	2	3	4	1	4	3	4	2	4	5
405	nur	N330	11	20					1			1						1						4	4	1	1	4	4	4	4	4	4	1	1
406	nur	N331	14	26				1						1								1		4	2	1	1	5	4	5	2	5	4	2	1
407	nur	N332	11	21				1							1							1		1	2	2	2	3	1	4	4	4	2	3	4
408	nur	N333	11	19				1							1							1		3	4	2	2	4	2	3	3	4	3	2	3
409	nur	N334	11	19				1							1			1						3	3	3	2	4	2	4	3	2	2	3	2
410	nur	N335	13	26					1						1							1		1	1	1	1	4	3	4	2	2	1	2	5
411	nur	N336	11	19				1							1			1						2	2	2	2	4	2	4	2	3	2	2	2
412	nur	N337	13	26				1							1							1		4	4	2	2	5	4	5	1	5	2	1	2
413	nur	N338	11	22				1							1				1					4	4	2	3	4	2	4	1	4	3	2	1
414	nur	N339	11	19				1							1					1	1			2	3	2	1	4	2	4	2	4	2	2	1
415	nur	N340	11	19				1							1				1					2	2	2	4	5	1	5	2	1	2	3	3
416	nur	N341	11	21				1							1							1		4	4	3	1	4	3	4	4	3	4	3	1
417	nur	N342	11	23				1							1				1					2	2	2	2	5	2	5	2	3	2	2	2
418	nur	N343	13	30				1							1							1		3	2	1	2	5	1	5	2	3	2	2	3
419	nur	N344	11	19				1							1							1		1	2	1	2	3	1	3	2	3	1	2	3
420	nur	N345	11	21				1							1							1		4	4	1	1	4	4	4	2	3	1	2	1
421	nur	N346	13	40				1							1							1		3	2	2	3	4	4	4	3	3	3	3	3
422	nur	N347	13	26				1							1							1		2	4	2	2	5	2	4	3	5	2	3	2
423	nur	N348	13	39				1							1			1						2	3	2	2	2	3	2	2	2	3	2	2
424	nur	N349	13	26					1						1							1		3	4	2	2	5	2	4	2	2	3	2	2
425	nur	N350	11	18				1							1							1		2	2	2	2	3	2	3	2	3	2	2	4
426	nur	N351	11	19				1							1			1						1	1	1	1	5	2	5	1	5	1	1	3
427	nur	N352	11	20				1							1							1		3	4	3	3	2	2	2	4	1	3	3	4
428	nur	N353	13	24				1							1							1		4	2	1	1	4	3	4	5	4	5	2	5
429	nur	N354	13	32				1							1							1		2	2	1	1	5	2	5	4	4	2	1	2
430	nur	N355	11	21				1							1							1		2	2	2	1	5	2	5	2	2	2	2	1
431	nur	N356	11	21				1							1							1		3	3	3	1	4	3	4	4	2	2	3	1
432	nur	N357	13	35				1							1								1	4	3	2	1	3	4	3	2	4	4	2	2
433	nur	N358	11	21				1							1			1						4	3	4	2	5	5	4	4	3	4	4	2
434	nur	N359	11	21				1							1							1		4	5	3	2	5	4	5	4	2	4	2	2
435	nur	N360	11	20				1							1							1		4	4	2	1	5	4	4	1	2	4	1	1
436	nur	N361	11	21				1							1					1				4	5	4	1	5	4	5	5	5	4	5	1
437	nur	N362	11	21				1							1							1		2	3	1	1	5	1	5	5	2	1	3	2
438	nur	N363	11	21				1							1							1		2	3	2	1	5	2	5	2	5	2	2	2
439	nur	N364	11	21				1							1							1		2	4	2	1	5	2	4	2	4	2	1	4
440	nur	N365	12	23				1							1				1	1				3	4	3	1	5	4	4	2	3	3	4	1
441	nur	N366	11	21				1							1							1		2	2	2	2	4	2	2	2	4	2	2	2
442	nur	N367	11	22				1							1							1		3	2	1	1	4	3	4	2	4	2	2	2
443	nur	N368	12	26				1							1			1						4	2	4	1	4	4	4	1	4	4	3	2
444	nur	N369	12	24					1						1			1						2	2	1	2	5	4	4	2	2	3	2	2
445	nur	N370	11	21				1							1			1		1				2	3	1	1	5	2	5	1	5	3	1	2
446	nur	N371	11	21				1							1							1		2	3	2	2	4	2	4	2	2	2	4	3
447	nur	N372	11	21				1							1							1		3	2	2	1	4	2	4	2	2	3	2	2
448	nur	N373	11	20				1							1				1			1		1	1	1	1	5	1	4	1	2	1	1	2
449	nur	N374	13	40				1							1							1		2	3	1	1	4	3	4	1	4	2	2	3
450	nur	N375	11	20				1							1			1						4	4	4	1	4	2	4	2	2	3	4	1
451	nur	N376	11	21				1							1							1		3	3	3	1	4	3	4	1	3	2	3	3
452	nur	N377	11	20				1							1							1		2	3	1	1	5	2	5	2	4	1	2	2
453	nur	N378	13	32					1						1							1		4	4	2	1	5	4	5	2	5	4	1	1
454	nur	N379	11	20				1							1			1						4	4	3	2	4	2	4	3	2	3	3	2
455	nur	N380	11	20				1							1			1						3	4	2	2	5	2	3	4	3	2	2	2
456	nur	N381	11	21				1							1					1		1		3	4	2	1	5	4	4	4	4	3	4	1
457	nur	N382	11	19				1							1			1						1	1	1	1	1	1	1	1	1	1	1	1
458	nur	N383	11	20				1							1							1		2	3	1	1	4	2	3	2	2	2	2	2
459	nur	N384	11	20				1							1							1		2	4	2	1	5	1	4	2	4	2	2	4
460	nur	N385	11	20				1							1							1		3	3	1	1	4	4	4	1	2	2	1	1
461	nur	N386	11	20				1							1							1		3	1	3	3	3	1	3	1	3	3	3	3
462	nur	N387	11	20				1							1							1		2	3	2	2	3	2	4	2	3	2	2	3
463	nur	N388	11	21				1							1							1		2	2	1	1	4	1	4	2	3	2	1	3
1	den	D001	22	27					1			1						1						3	1	3	1	3	4	3	1	2	5	4	1
2	den	D002	23	24				1							1							1		3	2	1	1	5	3	5	4	5	4	2	2
3	den	D003	23	24				1							1							1		2	4	1	1	4	4	4	2	3	3	1	1
4	den	D004	22	24					1				1					1						3	3	2	3	3	4	3	4	3	3	2	3
5	den	D005	24	30					1						1							1		3	4	1	1	4	4	4	2	3	3	2	2
6	den	D006	23	24					1			1										1		2	3	1	1	4	5	5	2	5	4	2	1
7	den	D007	23	24				1							1							1		2	3	2	1	4	4	4	3	3	3	2	1
8	den	D008	23	25				1					1					1						3	1	1	1	5	5	4	2	4	3	1	1
9	den	D009	23	24				1			1							1						4	2	1	1	4	4	4	1	5	3	1	1
10	den	D010	24	33				1							1			1						5	5	2	1	5	5	3	3	5	2	1	1
11	den	D011	23	26					1						1							1		3	1	1	1	5	3	5	3	3	1	1	3
12	den	D012	23	23				1							1			1						3	2	2	1	5	5	3	4	2	3	2	2
13	den	D013	23	32					1						1							1		5	5	5	1	5	5	5	5	5	5	5	1
14	den	D014	23	26					1						1							1		3	3	2	1	3	3	4	2	2	3	3	4
15	den	D015	22	24				1							1			1						2	2	1	1	4	3	5	4	5	3	2	2
16	den	D016	23	25				1							1			1						4	4	4	1	4	4	4	4	3	3	4	2
17	den	D017	24	25				1							1							1		4	4	3	2	2	5	3	4	3	3	4	3
18	den	D018	24	29				1							1			1						2	2	1	1	4	4	4	2	5	5	1	1
19	den	D019	22	24					1						1							1		3	2	1	1	4	4	3	2	3	3	2	4
20	den	D020	22	24					1			1	1	1				1						3	2	1	1	4	2	4	3	3	3	3	1
21	den	D021	24	25					1						1							1		3	3	2	1	4	4	4	4	4	2	2	4
22	den	D022	22	25				1					1									1		3	2	4	1	5	4	4	4	2	3	4	1
23	den	D023	22	24				1									1					1		3	2	1	1	5	4	5	2	5	4	1	1
24	den	D024	22	25				1							1							1		2	4	1	1	4	4	2	1	4	3	1	1
25	den	D025	23	25					1			1						1						3	2	1	1	3	4	2	4	4	3	2	1
26	den	D026	24	27				1							1							1		1	1	1	1	4	3	3	2	4	2	2	4
27	den	D027	24	24					1						1							1		2	3	1	2	4	2	4	2	5	3	2	5
28	den	D028	24	25				1							1							1		3	2	1	1	5	5	5	2	4	2	1	1
29	den	D029	24	25					1						1							1		4	4	1	1	4	5	2	5	4	5	2	4
30	den	D030	22	36					1			1										1		5	4	1	1	4	5	3	2	5	3	1	1
31	den	D031	24	24					1			1						1						5	5	1	1	3	5	2	2	4	4	2	1
32	den	D032	23	25					1			1						1						4	4	3	1	4	4	4	4	2	3	2	2
33	den	D033	23	34				1							1					1				2	2	1	1	3	2	2	2	2	2	2	2
34	den	D034	22	24				1							1			1						2	2	1	1	4	4	4	4	3	2	1	2
35	den	D035	22	23				1							1							1		3	3	2	1	3	4	3	4	3	3	2	3
36	den	D036	24	32				1							1							1		3	3	1	1	5	3	4	2	5	4	1	1
37	den	D037	23	25					1			1										1		4	4	1	1	4	5	5	2	4	4	1	1
38	den	D038	22	23					1						1							1		3	2	2	2	3	4	3	2	4	3	2	2
39	den	D039	22	23					1						1							1		2	2	1	1	4	3	4	3	3	3	3	2
40	den	D040	22	25				1					1	1	1			1						3	3	2	1	4	4	4	2	3	3	3	1
41	den	D041	22	23					1						1							1		3	3	2	2	4	4	3	3	3	3	3	3
42	den	D042	22	25					1						1			1						4	4	1	1	3	4	3	2	2	3	2	3
43	den	D043	22	24				1							1			1						3	2	1	1	4	4	4	3	2	4	2	1
44	den	D044	22	24				1							1			1						5	4	2	1	2	5	2	2	5	2	2	2
45	den	D045	22	25					1						1			1						2	2	2	1	2	3	3	2	3	3	2	3
46	den	D046	22	23				1							1							1		3	4	2	2	3	4	2	3	2	4	3	2
47	den	D047	22	23				1							1							1		1	3	1	1	5	5	5	3	4	2	1	2
48	den	D048	22	25				1							1			1						2	2	2	1	4	3	4	3	2	3	2	3
49	den	D049	22	24					1						1							1		2	4	1	1	4	5	4	2	2	2	1	3
50	den	D050	22	24				1							1							1		3	3	2	1	4	4	4	2	4	3	2	1
51	den	D051	22	23				1							1							1		4	4	2	2	5	5	5	4	2	4	4	2
52	den	D052	22	25				1							1							1		4	2	2	2	5	3	5	2	2	4	3	2
53	den	D053	22	23				1							1			1						3	2	1	1	4	3	3	2	5	3	2	2
54	den	D054	22	26				1							1			1						4	5	1	1	4	3	4	1	2	3	1	2
55	den	D055	22	24				1							1					1		1		3	2	1	1	4	3	4	4	3	3	3	2
56	den	D056	22	24				1							1				1					3	2	1	1	3	3	2	2	4	3	1	2
57	den	D057	22	23				1							1				1					3	5	1	1	3	5	3	1	4	4	1	2
58	den	D058	22	23					1						1				1					4	3	2	1	4	5	5	2	4	5	2	2
59	den	D059	22	24					1						1			1						4	2	1	1	5	5	5	4	4	3	3	2
60	den	D060	22	24					1						1							1		2	2	1	1	3	4	3	1	3	2	1	3
61	den	D061	23	24				1							1							1		2	2	2	2	4	4	4	3	2	4	2	3
62	den	D062	23	27					1						1							1		2	3	2	1	3	4	2	4	4	2	2	3
63	den	D063	23	33				1							1					1				4	4	4	2	3	3	4	2	2	2	3	2
64	den	D064	23	25					1						1							1		1	3	1	1	5	2	3	4	3	2	2	3
65	den	D065	23	24				1							1							1		3	2	2	1	5	4	4	2	4	3	2	2
66	den	D066	23	25					1						1			1				1		3	1	1	1	3	3	3	2	4	3	1	2
67	den	D067	23	26				1							1			1						2	4	2	2	4	3	4	2	3	3	2	2
68	den	D068	23	24				1							1							1		3	3	2	1	4	4	4	5	3	3	3	2
69	den	D069	23	23				1							1			1						2	2	1	1	3	3	3	3	3	4	2	3
70	den	D070	23	25				1							1					1				1	2	2	2	4	5	4	2	3	5	2	1
71	den	D071	23	24					1				1						1	1				2	2	2	2	4	3	4	3	3	2	2	1
72	den	D072	23	24				1							1			1						2	2	2	1	4	2	4	2	4	3	2	2
73	den	D073	23	24				1							1			1						2	4	2	2	4	4	4	4	2	2	2	3
74	den	D074	23	23				1							1							1		2	2	2	1	3	4	4	2	3	2	2	2
75	den	D075	23	27				1							1			1						2	2	1	1	1	4	1	2	4	1	1	1
76	den	D076	23	28					1						1							1		2	3	2	2	5	3	5	2	5	2	2	4
77	den	D077	23	25				1							1				1					3	4	2	2	4	4	4	4	3	3	2	3
78	den	D078	23	24				1							1					1		1		2	4	2	1	4	4	4	4	2	3	4	2
79	den	D079	21	32				1							1							1		3	3	1	2	3	2	2	2	4	2	1	3
80	den	D080	23	24				1							1							1		2	2	1	1	4	4	4	3	4	4	2	2
81	den	D081	23	26					1						1			1						3	4	3	1	2	4	3	3	2	3	4	3
82	den	D082	23	26					1						1			1						3	4	2	1	5	3	5	3	4	3	2	2
83	den	D083	23	25				1							1				1					4	4	1	1	5	5	5	2	4	4	4	2
84	den	D084
85	den	D085	23	32				1							1							1		2	3	2	2	2	2	2	3	3	3	2	2
86	den	D086	23	24					1						1					1				2	2	2	2	4	2	4	2	4	3	2	1
87	den	D087	23	23				1							1			1						3	2	2	1	5	5	3	4	2	3	3	2
88	den	D088	23	28				1							1							1		2	2	2	1	4	4	4	4	4	3	2	2
89	den	D089	23	29					1			1										1		2	3	1	1	3	4	4	3	4	2	1	1
90	den	D090	23	24				1							1			1						2	2	2	1	4	2	4	2	2	3	4	2
91	den	D091	23	29				1							1			1						2	2	2	2	2	2	3	4	4	2	3	2
92	den	D092	23	29				1							1					1		1		3	4	2	1	4	4	4	2	4	3	3	2
93	den	D093	23	23				1							1			1						5	5	2	5	5	5	5	3	5	5	5	5
94	den	D094	23	26					1						1							1		2	5	1	1	4	5	4	2	4	3	1	2
95	den	D095	23	28					1						1			1				1		1	1	1	5	5	4	5	1	5	3	1	2
96	den	D096	23	43				1								1						1		2	2	1	1	3	2	3	3	3	2	1	1
97	den	D097	23	25					1						1			1						2	2	2	1	4	4	4	3	3	2	2	3
98	den	D098	23	25				1							1							1		2	2	2	2	4	2	4	4	3	3	2	2
99	den	D099	23	24				1									1					1		3	2	1	1	5	4	5	1	4	4	1	1
100	den	D100	23	25				1					1					1				1		2	3	2	3	5	1	4	1	5	1	1	4
101	den	D101	23	31					1						1							1		4	4	4	2	4	4	4	4	2	3	4	3
102	den	D102	22	23				1							1			1				1		4	2	1	1	4	5	4	2	3	3	1	1
103	den	D103	22	25				1							1			1						2	3	2	1	4	4	4	3	2	3	2	2
104	den	D104	23	37				1							1			1						3	3	1	1	4	3	4	5	4	4	1	2
105	den	D105	23	26				1							1					1				3	4	2	1	4	4	3	3	4	3	3	2
106	den	D106	23	25					1						1							1		1	1	1	1	4	3	4	2	4	3	3	3
107	den	D107	23	26				1							1							1		2	3	2	1	3	5	4	3	3	4	2	1
108	den	D108	23	24				1							1			1						2	3	2	1	3	4	3	4	4	2	2	3
109	den	D109	23	29					1						1			1						2	2	2	2	3	2	3	2	2	2	2	3
110	den	D110	23	24					1						1							1		1	1	1	1	4	2	2	2	5	2	1	5
111	den	D111	23	37				1							1							1		2	2	2	2	4	3	2	5	2	2	3	4
112	den	D112	23	24				1							1			1						2	2	1	1	4	3	4	1	4	3	1	4
113	den	D113	22	30					1						1							1		4	4	1	1	4	5	5	4	5	4	1	1
114	den	D114	21	22				1							1							1		1	1	1	1	5	4	5	2	4	3	1	1
115	den	D115	21	24				1							1							1		3	1	1	1	5	3	4	3	5	3	1	1
116	den	D116	21	22					1						1							1		2	2	1	1	3	3	3	2	4	3	1	2
117	den	D117	21	22				1							1			1						3	2	3	3	3	4	5	1	3	2	3	3
118	den	D118	21	23					1			1										1		3	1	1	1	5	5	5	3	5	2	1	1
119	den	D119	21	23				1							1				1					3	3	1	1	5	3	5	2	5	3	1	1
120	den	D120	21	28				1			1											1		3	2	1	1	5	4	5	1	5	3	5	2
121	den	D121	21	22					1						1							1		2	2	1	1	3	3	3	3	4	3	1	2
122	den	D122	21	28				1			1								1					5	5	1	1	4	5	4	2	5	3	1	2
123	den	D123	21	21				1							1			1						3	2	2	1	4	5	5	2	4	3	1	2
124	den	D124	21	23				1							1							1		2	2	1	1	4	2	3	2	2	3	1	1
125	den	D125	21	23				1							1							1		3	4	2	1	3	5	4	5	2	3	2	2
126	den	D126	21	23				1							1			1						2	2	1	1	2	4	2	4	4	2	3	1
127	den	D127	21	22					1						1			1						3	2	1	1	4	3	4	2	3	3	3	3

## Sheet: Coding for demographics
	Train code			Gender		Orientation		Race ethnicity
	1	Med year 1		1	MTF	1	Lesbian	1	Asian
	2	Med year 2		2	FTM	2	Gay	2	Black
	3	Med year 3		3	Genderqueer	3	Bisexual	3	Latino/Hispanic
	4	Med year 4		4	Female	4	Queer	4	Native American/Alaskan Native/Pacific Islander
	11	Nursing undergrad		5	Male	5	Straight	5	White
	12	Nursing Accel BSN		6	Other	6	Asexual	6	Other
	13	Nursing MSN				7	Other
	14	Nursing Doctoral
	21	Den 1
	22	Den 2
	23	Den 3
	24	Den 4
